# Supplementary material
Source: PubMed Central journal article supplement (PMC3699344)
Supplement: NIHMS478083-supplement-Supplements.pdf [file NIHMS478083-supplement-Supplements.pdf]

# Supplementary Materials for

## Lineage Structure of the Human Antibody Repertoire in Response to Influenza Vaccination

Ning Jiang, Jiankui He, Joshua A. Weinstein, Lolita Penland, Sanae Sasaki, Xiao-Song He,  
Cornelia L. Dekker, Nai-ying Zheng, Min Huang, Meghan Sullivan, Patrick C. Wilson, Harry B.  
Greenberg, Mark M. Davis, Daniel S. Fisher, and Stephen R. Quake<sup>†</sup>

<sup>†</sup> To whom correspondence should be addressed. Email: [quake@stanford.edu](mailto:quake@stanford.edu)

### **Section 1: data analysis**

#### *Primary sequencing reads processing*

Reads from Roche 454 entered into the primary analysis; see the flowchart in fig. S1. Only those reads that matched exactly to the corresponding sample's MID code were included for further process. These reads were then filtered for a minimum length of 250 bp, see Supplementary Table 3 for filtered reads number for each sample. Longer reads were truncated to this length. Only these reads were considered for the rest of the analysis. The isotype of each read was identified by the reverse primer at the constant region; see fig. S2 for isotype composition.

#### *Isotype class switch*

One important process of affinity maturation is isotype switching. The naïve B cells are mostly expressing IgM and they undergo isotype switching from IgM to IgG, IgA or IgE after antigen stimulation and proliferation. We explicitly verified the presence of isotype switching in the sequence data by taking a closer look at the lineages in the plasmablasts for each subjects. We re-performed the clustering analysis on pooled IgM and IgG sequences and allow both isotypes to join the same lineage as long as their CDR3 region satisfied the predetermined criteria, which is 1 amino acid difference. Here, we consider a lineage is isotype switched, if both IgM and IgG sequences are observed in the lineage. Elderly have less isotype switched lineages than that of children (see fig. S4). We observed only a few cases where the identical variable region can be found in both IgG and IgM isotopes. But for most of the cases, extensive mutations also occurred throughout the variable region as exemplified in fig. S5.

### *VDJ classification*

Human heavy-chain variable gene segment sequences (244 V-exon, 37 D-exon and 13 J-exon) were downloaded from the International ImmunoGeneTics information system database (IMGT, <http://www.imgt.org/textes/vquest/refseqh.html>) (27), excluding pseudogenes. These germline sequence templates of V and J can be grouped by combining alleles into subclasses. In total, 63 V and 7 J subclasses were obtained. D-exons were not grouped because they are highly diversified. Each read was first aligned to V-consensus sequences taken over each V-family. The specific V-variant with a maximum Smith-Waterman score (15) was then assigned. J-segments (out of 13 variants) and D-segments (out of 37) were then assigned as described (15), with ambiguous D-segments given their own class. Grouping each V, D, and J gene assignment into subclasses gave the total number of possible VDJ subclass assignments of 63 (V)  $\times$  37 (D)  $\times$  7 (J) = 16317 (VDJ). The mutation from germline sequence was counted as the number of substitutions from the best aligned V, D and J templates. Unaligned region at the VD and DJ junctions was excluded from the mutation count.

### *Translation from nucleotide to amino acid sequences*

Nucleotide sequences were translated into amino acid sequences based on codon translation (see the flowchart in fig. S1). We used the amino acid sequences in the IMGT database as the reference to detect the correct translation frame in the V region. If the reading frame was correct at the constant region, the translation was accepted for further analysis. Since the dominant sequencing error in 454 Roche platform is insertion and deletion, if the translation was out of frame at the constant region, we performed sequence translation rescue. We deleted all insertions and filled the deletions by the corresponding nucleotide base in the germline sequences, and performed a second translation. If the second translation had the correct reading frame at the constant region, the rescue was successful and the protein sequence from the second translation was accepted for further analysis, otherwise, the sequence was discarded. About 12% of reads were discarded. CDR3 region detection was based on two sequence markers. The boundary of CDR3 is defined by amino acid sequence from ‘tyr-(tyr/phe)-cys’ to ‘trp-gly’ (29).

### *Protein distance analysis*

Protein distance analysis is a way to caption overall relationship of proteins in the entire repertoire. The CDR3 sequence difference  $d_{ij}$  was defined as the hamming distance between protein sequence  $i$  and protein sequence  $j$  in the CDR3 region. We used the minimum distance of sequence  $i$  to other sequences in the same sample, formally:

$$\tilde{d}_i = \min(d_{ij}, j = 1, 2 \dots N)$$

The VD junction and DJ junction regions are around 15 nucleotide bases long in total, therefore, two sequences with the same VDJ assignment but from independent VDJ recombination event may differ by 5 amino acids ( $d_{ij} \approx 5$ ). The hypermutation rate is estimated to between  $10^{-3}$  and

$10^{-4}$  per base pair per generation (30) and the average CDR3 length is 58bp, thus, two sequences that differ by one amino acid at the CDR3 are likely from the descents of the same naïve B cell.

### *CDR3 distance distribution*

In order to study the relative distance between any two sequence read, we performed the following analysis on amino acid sequences following the scheme described in fig. S1. We first catalog amino acid difference in the CDR3 region between any two sequencing reads, which can be as small as 1 amino acid or as large as 18 amino acids, and grouped sequencing reads according to this difference. If a sequence can be grouped to several groups following this difference, then this sequence will be assigned to a group with minimum amino acid difference. Resulted distribution showed two distinct peaks, one is at 1 amino acid and the other expands 4 to 10 amino acids, as observed in fig. S6. This distribution provided us a guideline to set the threshold when clustering was used as a way to group sequences into lineages.

### *Clustering Sequences into Clonal lineages*

Sequences with similar CDR3 are possible progenies from the same naïve B cell and can be grouped into the same clonal lineage. To detect the lineage structure for the antibody repertoire, we performed single linkage clustering on protein sequences of CDR3 region, using a re-parameterization of the method described in Jiang et al 2011 (15), accounting for the larger size of the CDR3 and junction in humans as compared to zebrafish. Protein sequences with the same V and J assignment and with CDR3 region differed by no more than one amino acid were grouped together into a lineage. This is equivalent to a biological clone that is under clonal expansion.

The diversity of a lineage or a sample was defined as the number of unique sequences within the lineage or the sample, after grouping identical reads.

### *Lineage structure of antibody repertoire*

After grouping reads into lineages, we can take a detailed look of inter- and intra-lineage structure for a sample as exemplified in Fig. 2 and 4, and fig. S7-S10.

In fig. S8, the lineage structure of plasmablasts of all subjects in visit 2 were displayed in reference to mutation, diversity and reads of a lineage. In two of the elderly individuals (017-060 and 017-043), we observed dominant lineages that account for 49% of all reads observed in those samples. We performed the same lineage structure analysis for individual 017-060 in visit 1. The dominant lineage of 017-060 at visit 2 was not observed in visit 1.

### *Lineage structure of naïve B cells*

Lineage structure of naïve B cells and plasmablasts from the same subject were studied. The naïve B cells are dominant by single-read clusters without mutations from germline sequences while plasmablasts contain many lineages with varying amount of sequencing reads and mutations (see fig. S7).

### *Antibody abundance distribution*

The majority of the lineages contain only one reads, however, a few lineages are highly abundant. The distribution of lineage size of plasmablasts follows power law with the exponent of power - 1.7(fig. S13). There is no highly abundant lineage in naïve B cells and this can be explained by the fact that naïve B cells are not stimulated and have not undergone clonal expansion.

### *Mutation in V and J region*

It is concerned that the mutation in D region is unreliable, because the alignment of D region to germline reference could be ambiguous. Here, we demonstrate that the mutation pattern of different age groups in visit 1 PBMC is similar whether mutation in D region is counted or not (fig. S14). The trend of mutation pattern is the same if one compares fig. S14 to Fig. 3B.

### *Varying clustering threshold*

In the Fig. 2-4 of the main text, the single linkage clustering was performed with the threshold of one amino acid difference in the CDR3 region. Here, we show that the mutation patterns remain the same under different clustering thresholds.

## **Section 2: Control data**

### *Control library*

Control experiments were performed by a mixture of cloned zebra fish immunoglobulin genes that covered all possible V gene segments (11, 15). Briefly, 38 immunoglobulin genes for IgM containing different V gene segments were cloned into plasmid and sequenced using Sanger sequencing. To quantitatively measure the PCR bias and sequencing errors, plasmids containing 38 clones were pooled. Part of the pooled material went through the same PCR cycle as human samples and part of the pooled material was not PCR amplified. 454 libraries were made using these two sets of materials and sequenced using 454. The degree of error introduced in the sample amplification and sequencing process was estimated by comparing these two sets of control libraries to the most abundant sequence for each template.

The most abundant sequence from each template was chosen to be the reference sequence. Each 454 read was aligned to these reference sequences. All reads were translated into protein sequence and translation rescue was performed as well. As a result, this corrected most of the insertion and deletions which is the most common error for 454 sequencing. Following analysis is focus on substitution errors from PCR and sequencing. 77% sequence reads are error-free in their entire 220 bp nucleotide sequence (with 30 bp from the MID barcode and primer being excluded) and 13.6% sequence reads has one substitution (fig. S16B). The substitution error rate was estimated to be 0.065% per bp (detectable chimeras were excluded). Single lineage clustering is performed on nucleotide sequences. Linear relationship between reads in a lineage and unique sequences in a lineage is observed with a slope of 0.147 in the fig. S16C, in agreement with fraction of one-substitution reads. We also did single lineage clustering in protein level and observed a slope of 0.073 in the fig. S16A. In the human data, the diversity is usually higher than what is estimated from substitution error (fig. S17), if the human data is assumed to have the same error profile as zebrafish control data. In most of the subjects, the real sequences are much more than “artificial sequences” created from substitution errors.

### *Synthetic control data*

To test the reliability of our analysis pipelines, we constructed synthetic control data and processed the synthetic data using the same pipeline that was used on human data. The synthetic control data was generated from a single sequence with 3000 reads. The sequence was a randomly selected IgG heavy chain from one subject. Errors were added to the sequence reads to mimic the substitution errors. Each base of each reads was given a constant probability to be changed to another random nucleotide. Therefore, error rate in the synthetic control data was a predefined parameter and was indicated on the X-axis. The range tested is within the estimated substitution rate of 454 sequencing platform (11). The analysis showed that sequences included in the largest cluster linearly decrease with the error rate and the number of unique sequences linearly increase with error rate. The mutation from baseline also linearly depended on the error rate (fig. S18).

## Supplementary Figures

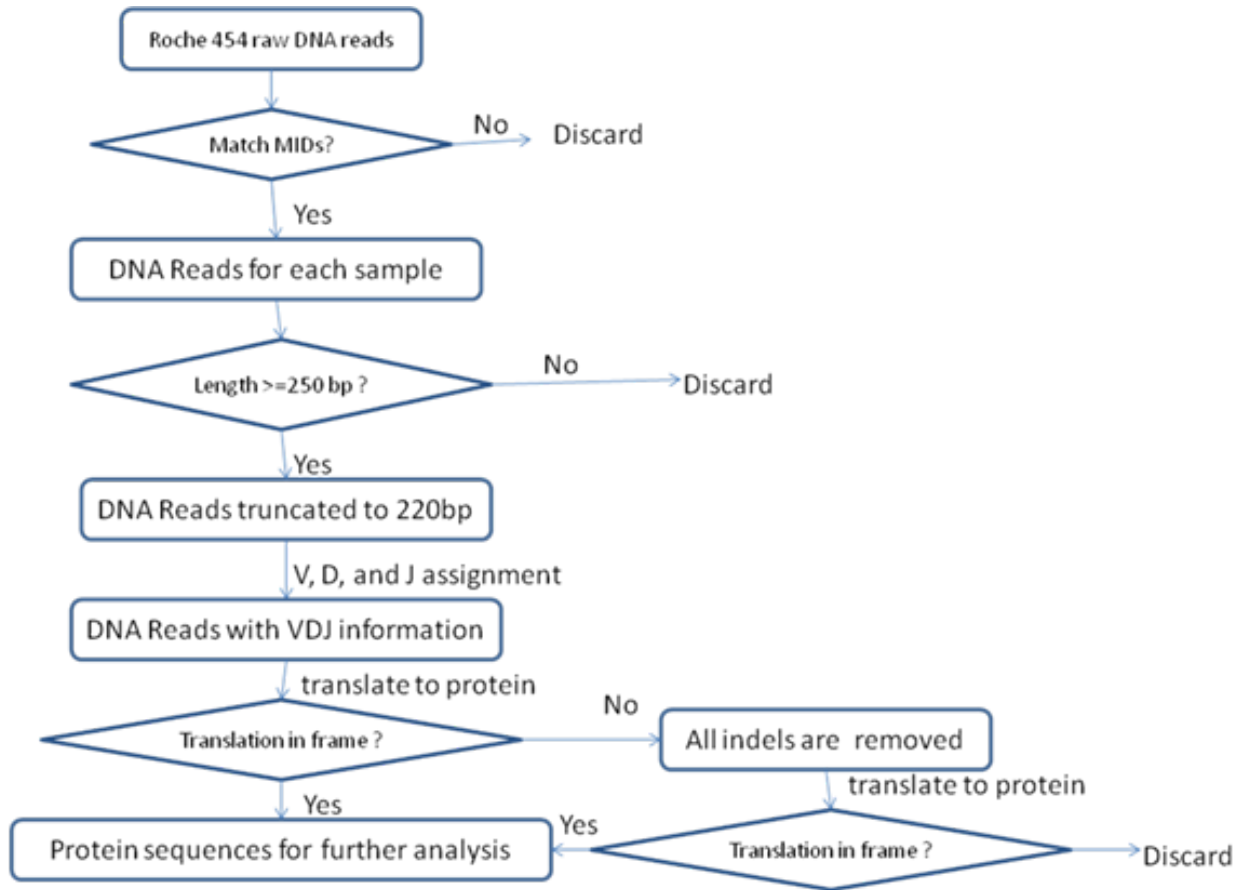

**Fig. S1.** Flowchart of bioinformatics pipeline. Whether the translated protein was in frame or not was determined by the constant region. The amino acids at the beginning of constant region of correct frame are S-P (IgA), P-T (IgD), S (IgG), S-A-S (IgM). For many samples, IgE accounts for less than 1% of the reads and therefore was not considered further in the analysis.

A

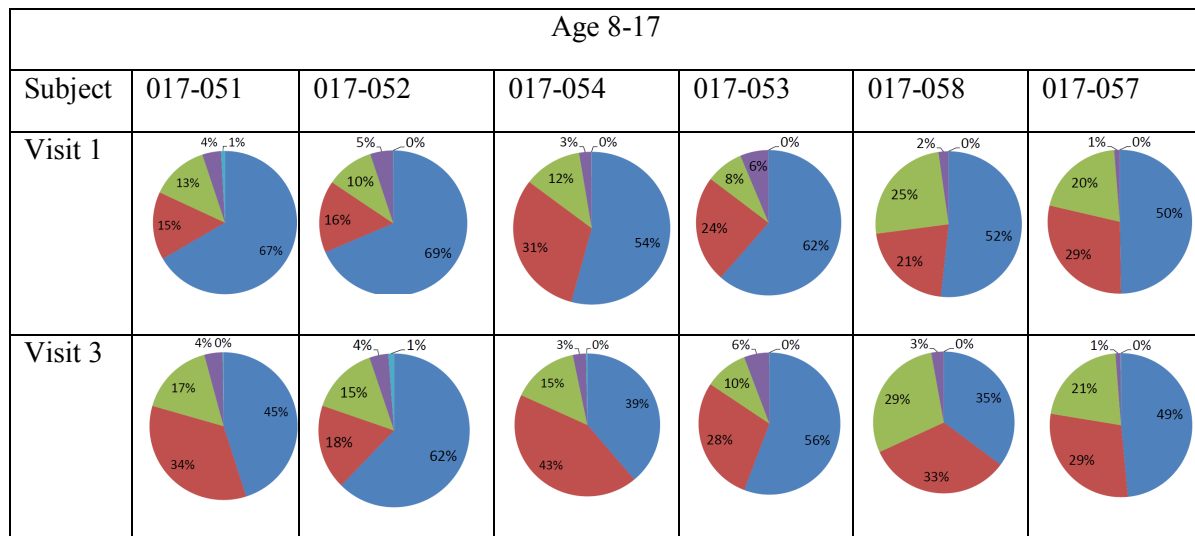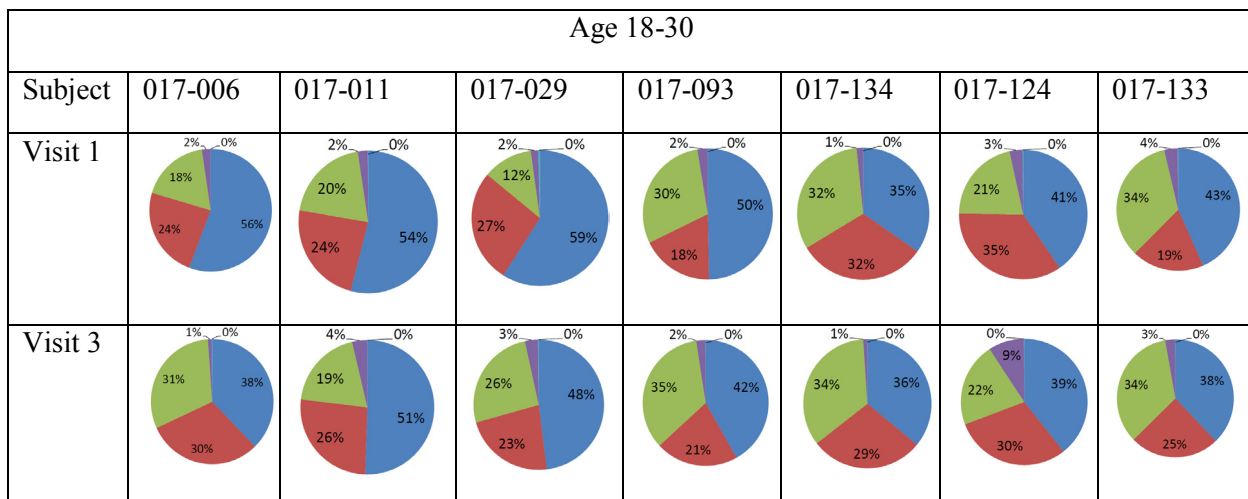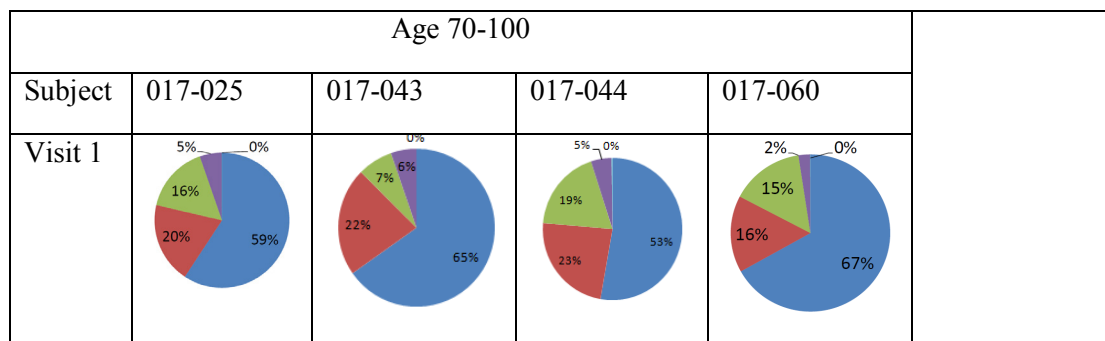

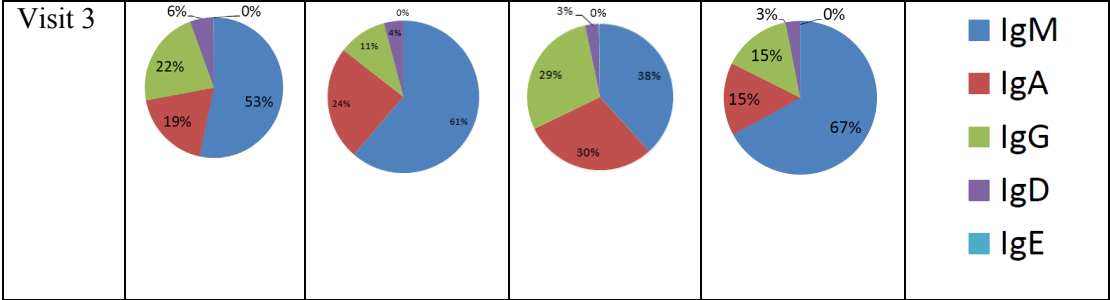

**Fig. S2.** The composition of five antibody isotypes from PBMCs for each subject at visits 1 and 3. The percentage of an isotype in a subject was calculated using the number of reads within a particular isotype divided by the total number of reads of this sample. Reads from a subset of runs were used. 3000 reads of subsampling was not applied here.



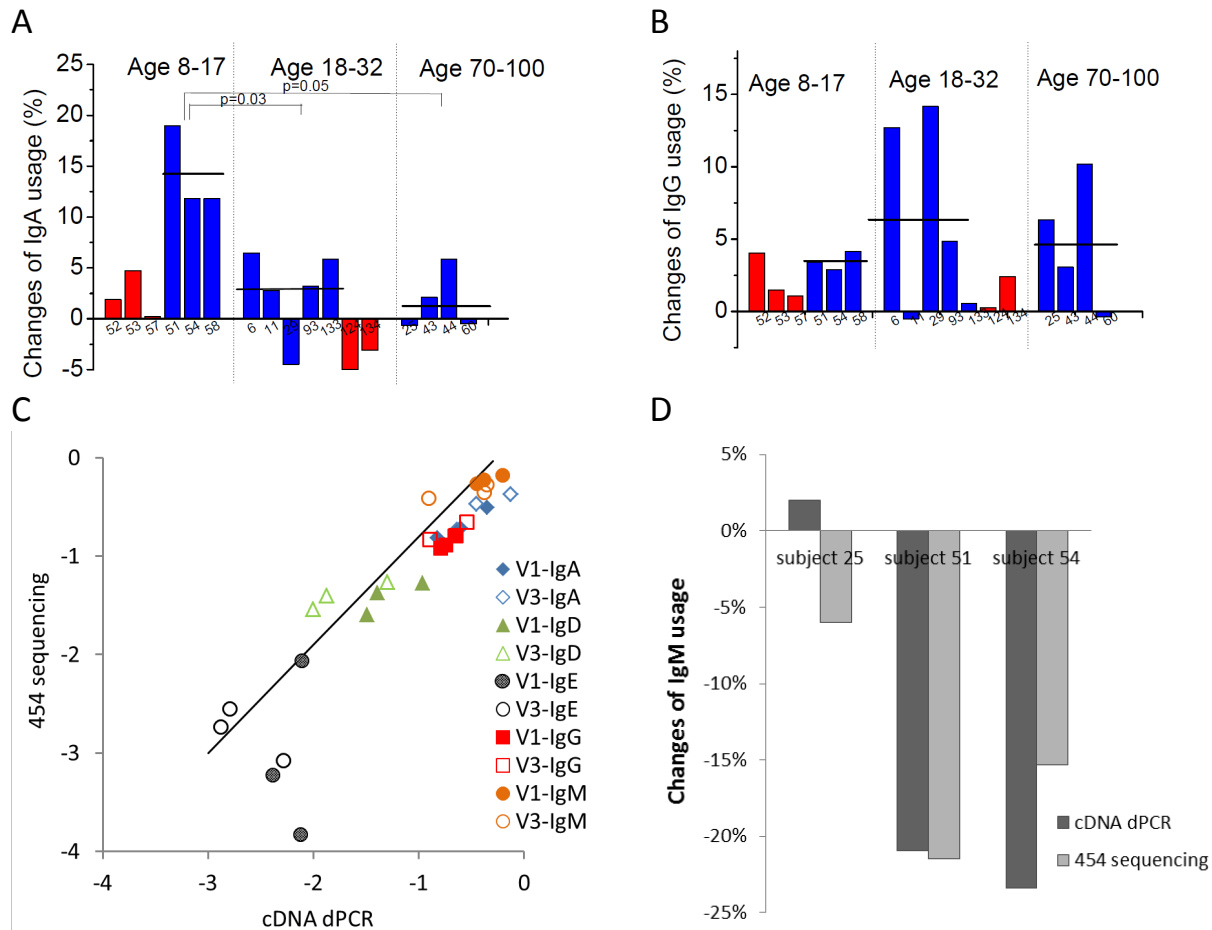

**Fig. S3.** Isotype changes from visit 1 to visit 3. (A), changes of individual's IgA usage in PBMCs from visit 1 to visit 3. IgA usage increases 14.21% (age 8-17), 2.77% (age 18-32) and 1.71% (age 70-100) at visit 3 on average for TIV receivers (black lines). (B), increase of individual's IgG usage in PBMCs from visit 1 to visit 3. IgG usage increases 3.4% (age 8-17), 6.3% (age 18-32) and 4.8% (age 70-100) at visit 3 on average for TIV receivers (black lines). The subject IDs are labeled on horizontal axis. 3000 reads of subsampling was not applied here, all reads were taken into calculation. Red, LAIV receivers; blue, TIV receivers. Children who received TIV were more likely to have an increased relative IgA usage compared to young adults ( $p=0.03$ , Mann-Whitney U test) or elderly ( $p=0.05$ , Mann-Whitney U test). Isotype composition was also verified by dPCR (23, 24) for three selected subjects. (C), Correlations of 5 antibody isotype compositions (percentage in log scale) between two different measurements (dPCR and 454 sequencing) for three subjects using PBMCs from visits 1 and 3. (D), Changes of relative IgM composition between visits 1 and 3 for these three subjects.

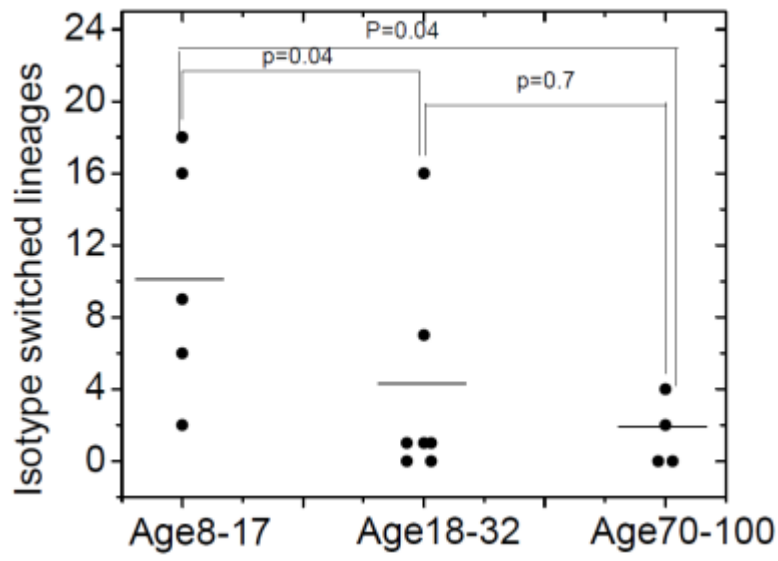

**Fig. S4.** Young subjects have more lineages that are isotype switched. For each subject, we pooled all IgM and IgG sequences and performed single linkage clustering as defined before. If a lineage is composed of both IgM and IgG sequences, this lineage is defined as an isotype switched lineage. p-values were calculated using Mann-Whitney U test.

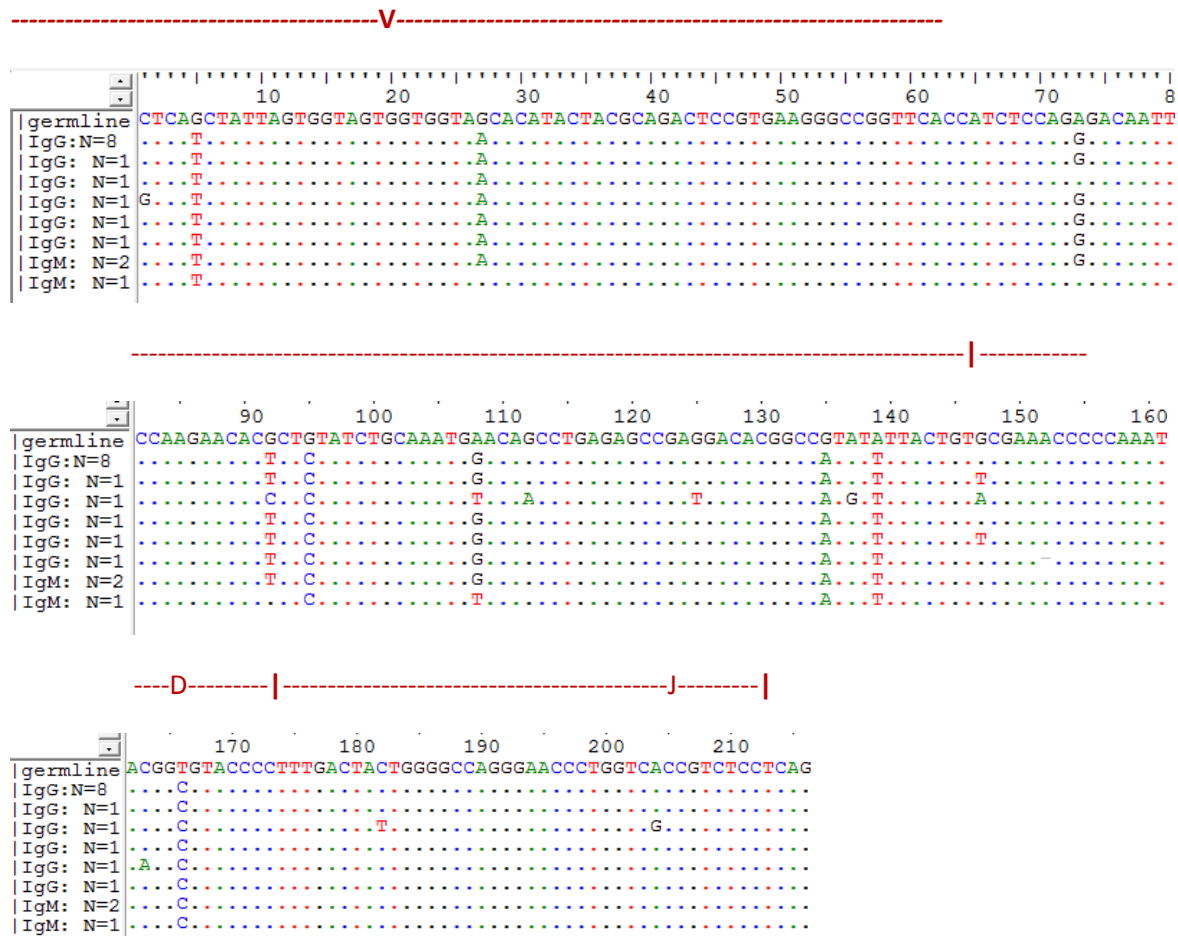

**Fig. S5.** Nucleotide sequence alignment for VDJ region exemplified for one isotype switched lineage. Sequence titles indicate isotype and numbers after N denote number of reads.

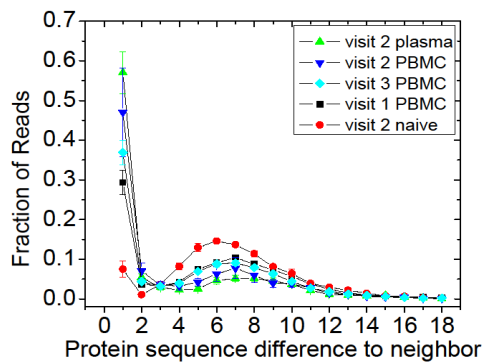

**Fig. S6.** Reads distribution based on relative sequence distance. For each reads in a sample, we search in the entire repertoire of this sample to find the neighboring read with minimum difference in the CDR3 region at protein sequence level. Distribution of reads with minimum distance to its neighbor were plotted. Sub-sampling of 3000 reads was performed.

A

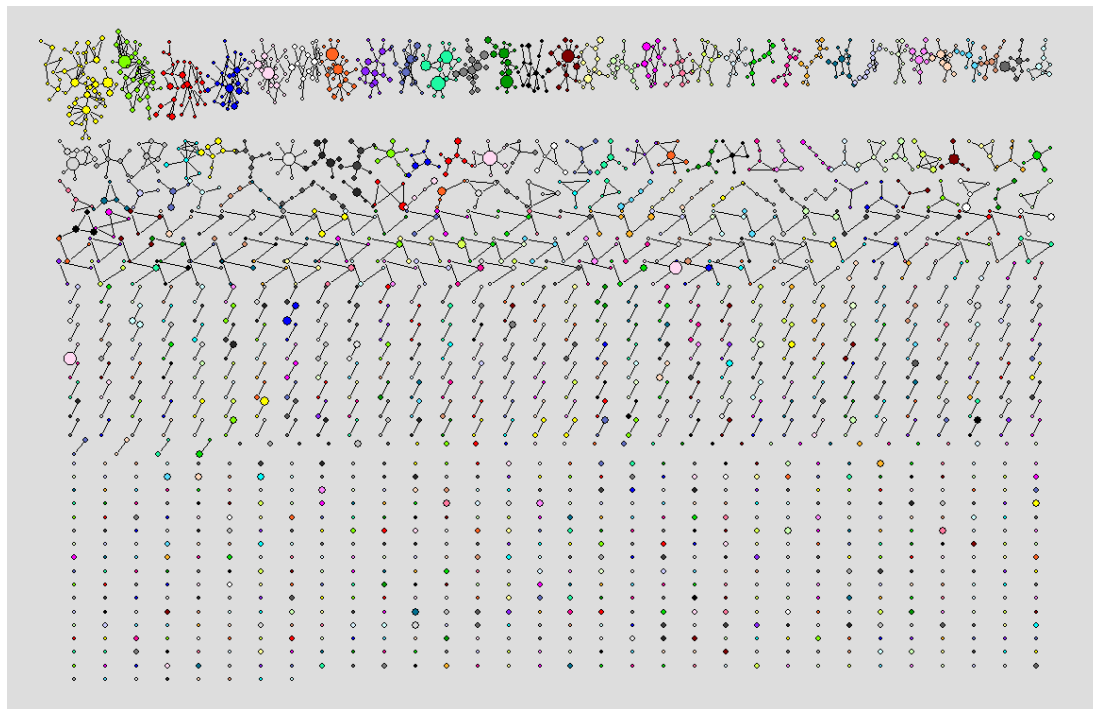

B

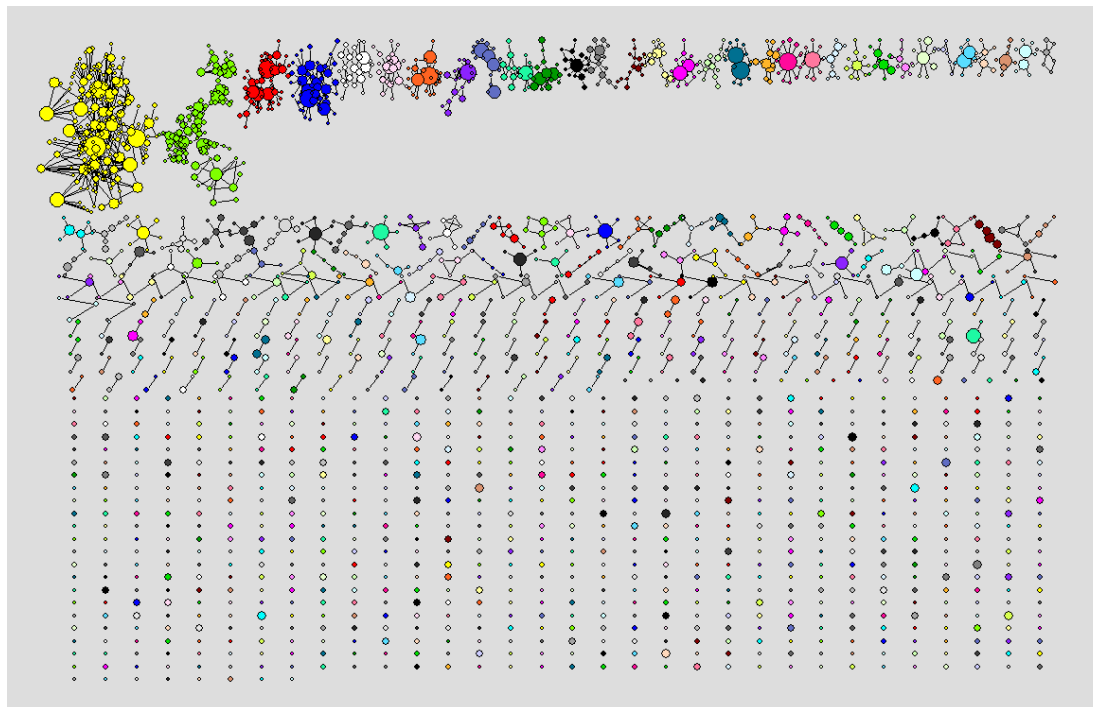

C

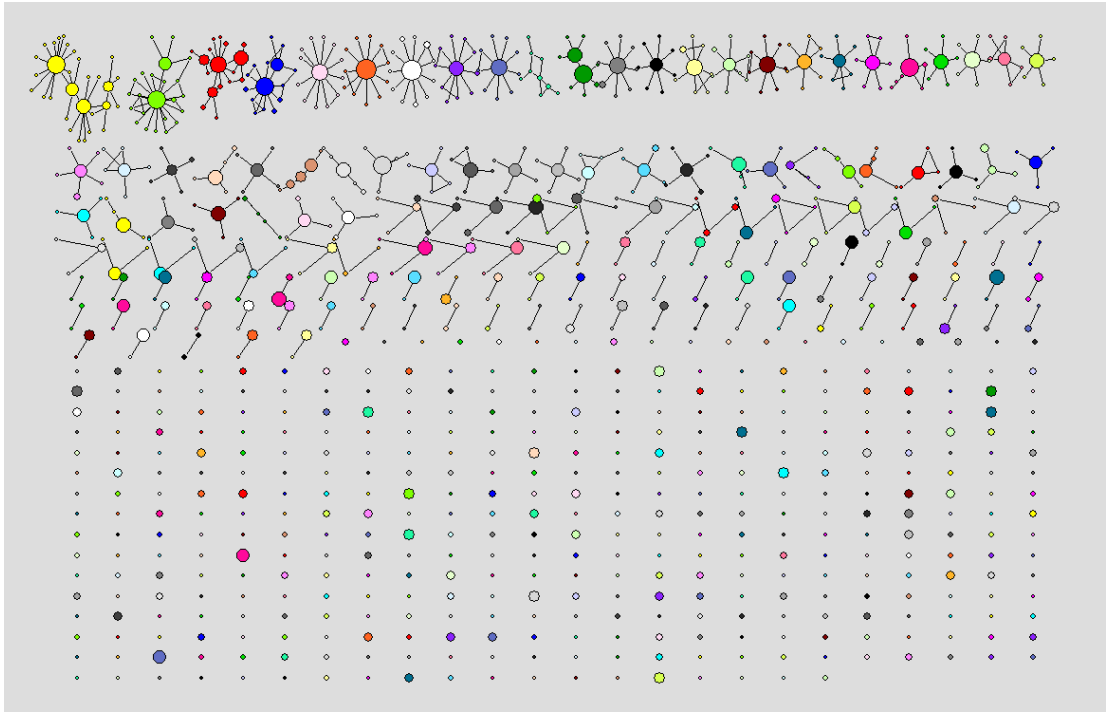

D

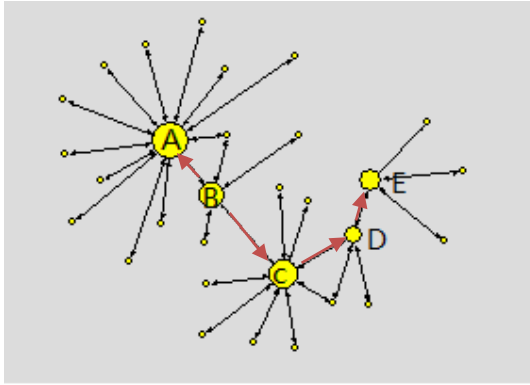

E

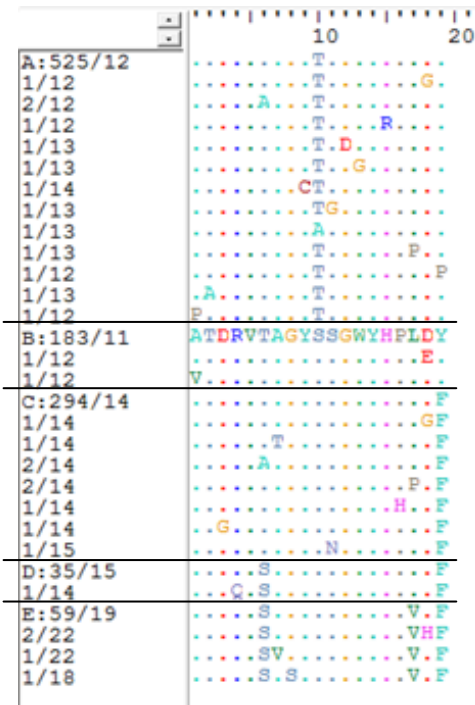

**Fig. S7.** The inter- and intra-lineage structure of all IgG lineages revealed by sequencing plasmablasts sorted from the visit 2 blood samples for selected subjects. Subject 53 (panel A, 9762 reads), subject 29 (panel B, 28712 reads) and subject 25 (panel C, 27079 reads). In this network representation, each cluster of dots connected by lines stands for a lineage. Different colors were used to distinguish different lineages. Each dot represents a unique CDR3 protein sequence. Two dots are linked if they differ by one amino acid in the CDR3 region as defined by the clustering threshold. The area of a dot is proportional to the number of reads with identical CDR3 protein sequences. Plots were generated using Pajek. (D), graphical presentation of an intra-lineage structure for the top lineage in panel A. Arrows indicate direction of mutation increase. (E), AA sequences alignment of the CDR3. Lines separate sequences belong to each node as indicated by letter A, B, C and D in panel D. In the headers of the alignment, X/Y means that the sequence has X identical reads in AA, and the average mutation to germline is Y in nucleotide.

Age 8-17

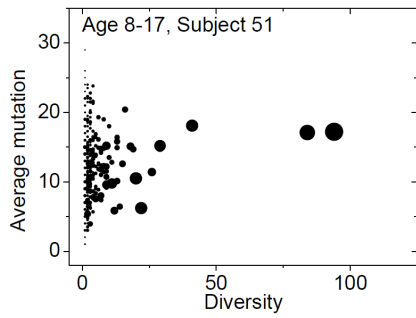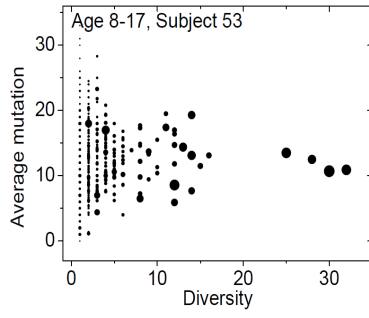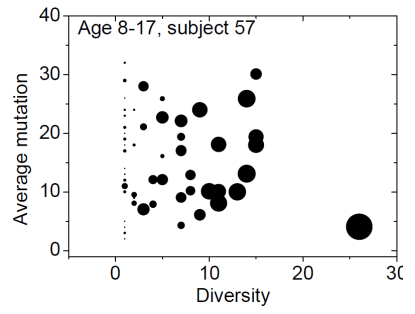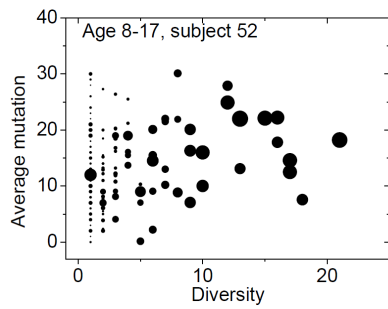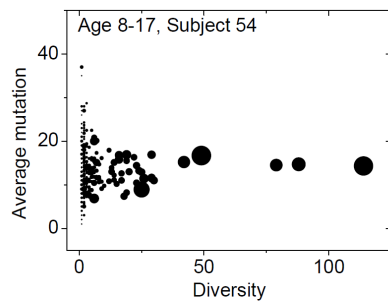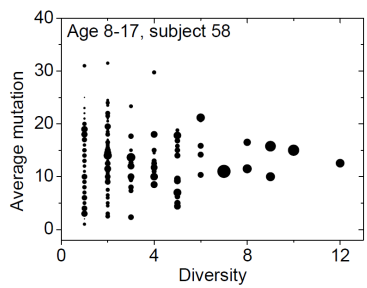

Age 18-32

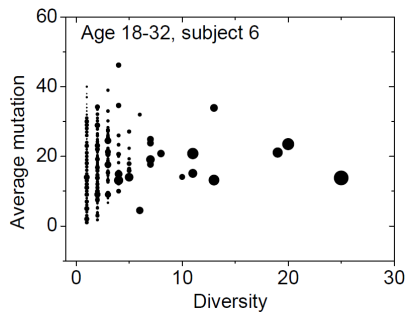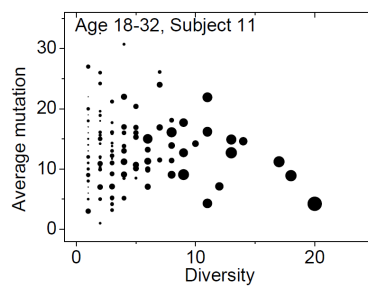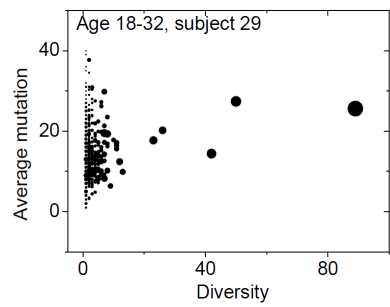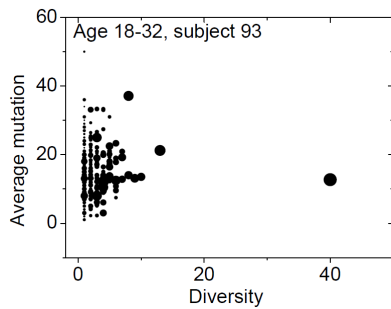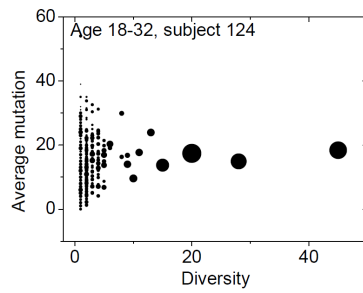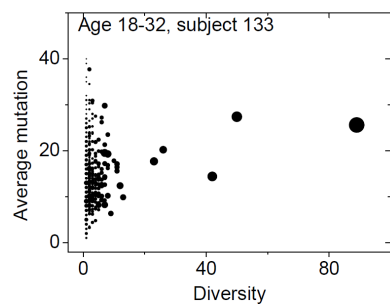



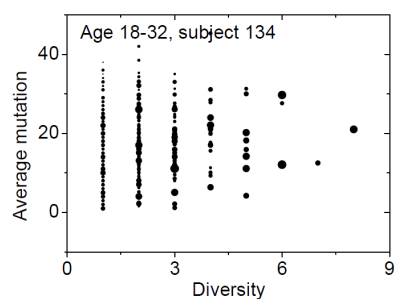

Age 70-100

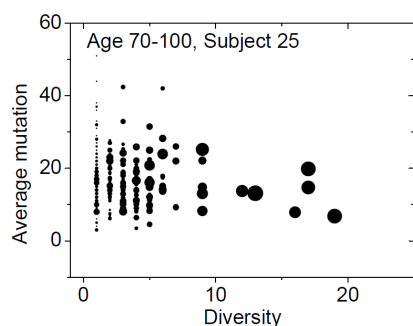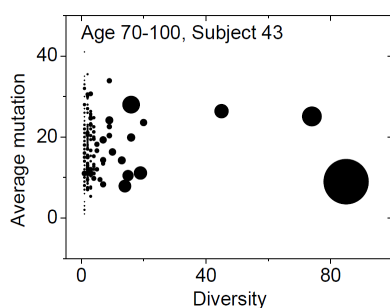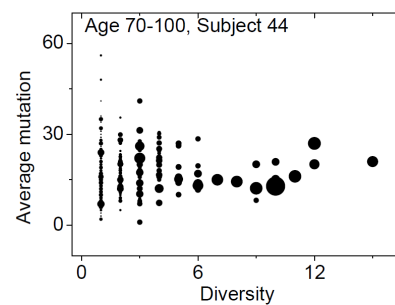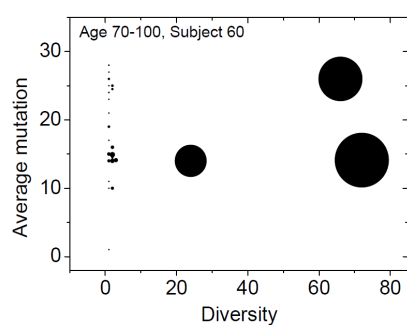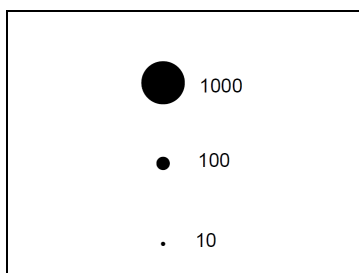

Scale bar

**Fig. S8.** The inter-lineage structure of IgG from plasmablasts sorted for all subjects at visit 2. Each panel represents one volunteer. In each panel, each dot represents a lineage of antibody sequences defined by single linkage clustering with 1 amino acid difference at CDR3 as the threshold. The area of the dot is proportional to the number of reads belongs to this lineage, as indicated in the scale bar in the last panel. X-axis is the diversity of the lineage which measures number of unique protein sequences (full protein sequence, not just the CDR3 region) within the lineage. Y-axis is the number of mutation at nucleotide level of the lineage averaged over reads. Subject 017-051 and subject 017-052, subject 017-053 and subject 017-054, and subject 017-057 and subject 017-058 are twin pairs. 3000 reads of subsampling was applied to this figure.

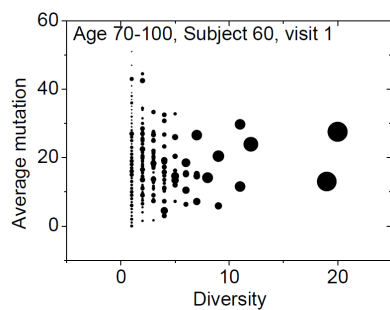

**Fig. S9.** The inter-lineage structure of IgG from PBMCs purified from subject 017-060 at visit 1. The plot was generated the same way as Supplementary Figure 5. This is in contrast to the lineage structure of plasmablasts sorted for the same subject at visit 2 (Supplementary Figure 5). The dominant lineage of subject 017-060 at visit 2 is not observed in visit 1. 3000 reads of subsampling was applied to this figure.

A

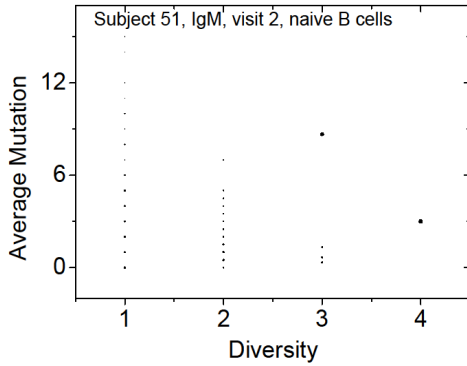

B

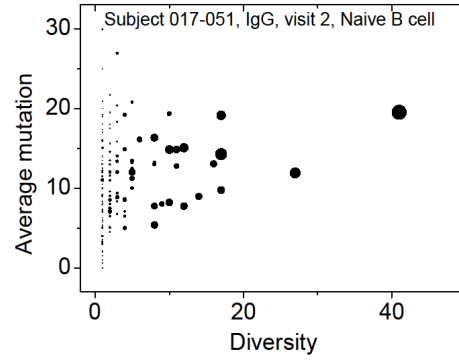

C

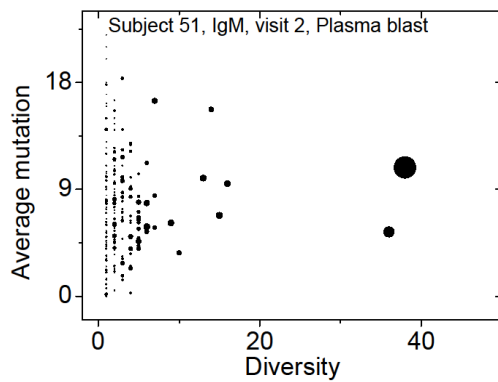

D

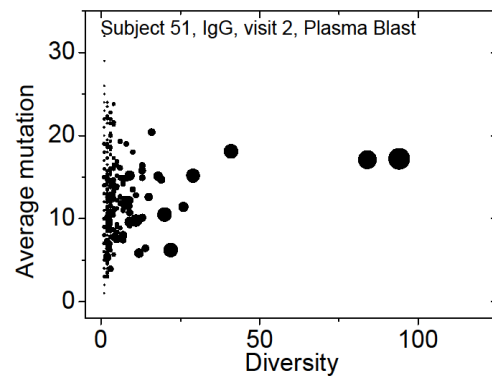

**Fig. S10.** The inter-lineage structure of IgM and IgG for naïve B cells and plasmablasts from one subject at visit 2. The plot was generated the same way as Supplementary Figure 5. Naïve B cells display minimum intra-lineage diversity (number of unique sequences within a lineage) compared to plasmablasts from the same subject. Most lineages in naïve B cell has only one read with no mutations, especially for the IgM isotype. IgM and IgG account for 60% and 21% of reads in subject 51's naïve B cells. IgM and IgG account for 10% and 63% of reads in subject 51's plasmablasts respectively. The average IgM in naïve B cells of all subjects is 75%. The average IgG in plasmablasts of all subjects is 63%. 3000 reads of subsampling was applied to this figure.

A

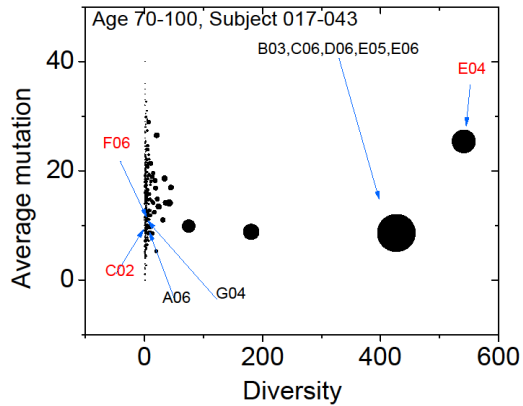

B

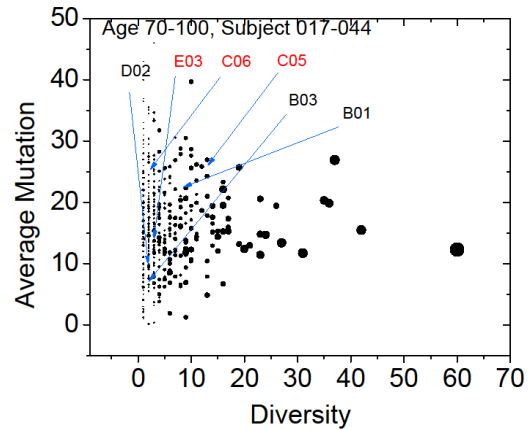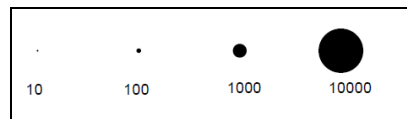

**Fig. S11.** Overlapping of single-cell cloned antibody sequences with lineages. Single cell cloning and high-throughput sequencing were performed on the same pool of sorted plasmablasts from two volunteers. Sequence overlapping between the two methods was demonstrated. The plot was generated the same way as Supplementary Figure 8. Single cell cloned antibodies are labeled with text. Red text indicates antibodies having a high affinity towards one of the virus strains used in the flu vaccine. Black text indicates antibodies with a low affinity towards one of the virus strains used in the flu vaccine or background level of binding towards all three virus strains. Antibodies G04, A06 in subject 017-043, and B03, C06, and D02 in subject 017-044 were not found in our high-throughput sequencing data. Please note that all reads are included in plotting these two figures, rather than using 3000 reads subsampling. To avoid the overlapping of dots, the size of the dots is scaled down 4 fold from number of sequencing reads, see the scale bar at the bottom.

A

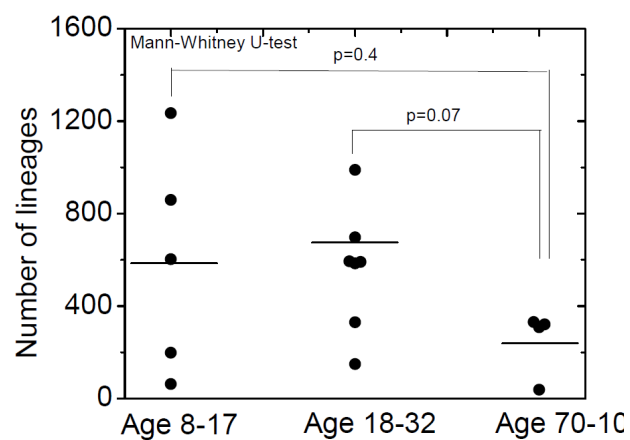

B

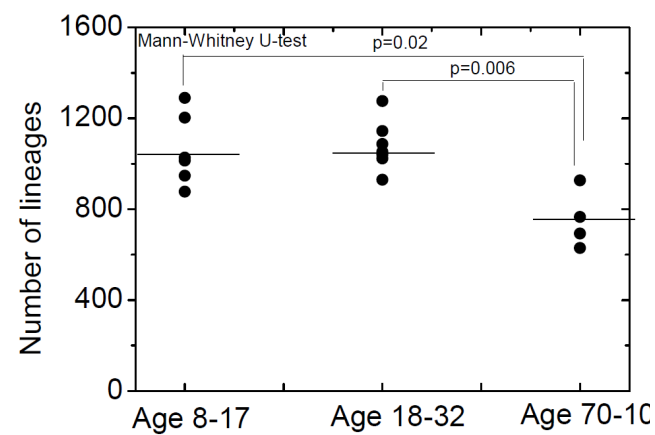

**Fig. S12.** Repertoire diversity changes with age. Repertoire diversity changes with age as measured by number of lineages in IgG from visit 2 plasmablasts (A) and IgG from visit 3 PBMCs (B). p value was calculated by Mann-Whitney U test. 3,000 reads subsampling was applied. There are 6 samples in the age group 8-17, 7 samples in the age group 18-32, 4 samples in the age group 70-100.

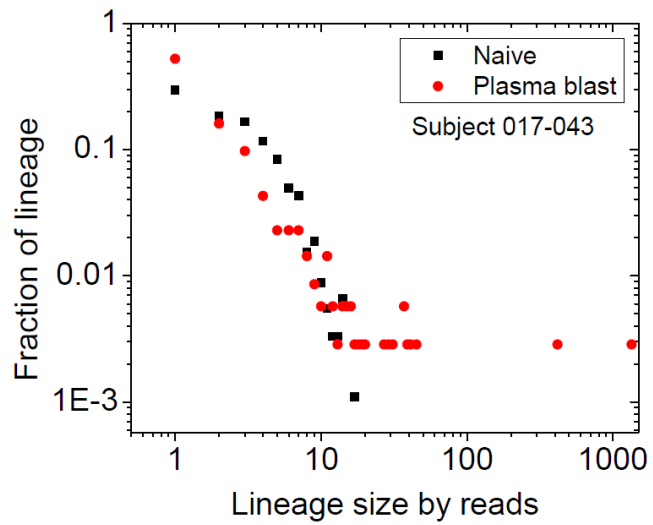

**Fig. S13.** Distribution of lineage size observes the power-law distribution. IgG lineages defined for the plasmablasts display a power-law distribution with a fat tail. The exponent of the power law is -1.7. The IgM lineage size distribution of naïve B cell does not exhibit this fat tail. 3000 reads of subsampling was applied to this figure.

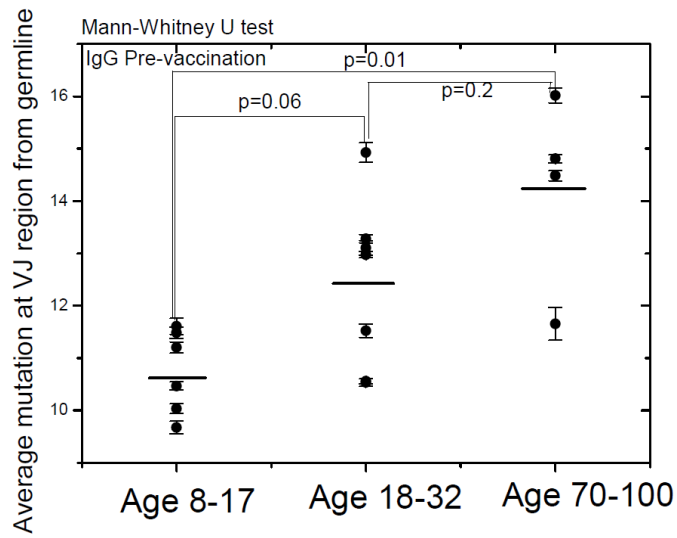

**Fig. S14.** Mutation pattern of IgG for three age groups in visit 1 PBMCs. The number of mutations for each read was defined as the number of mismatches to germline reference in V and J region. 3000 reads of subsampling was applied to this figure. All error bars are standard error.

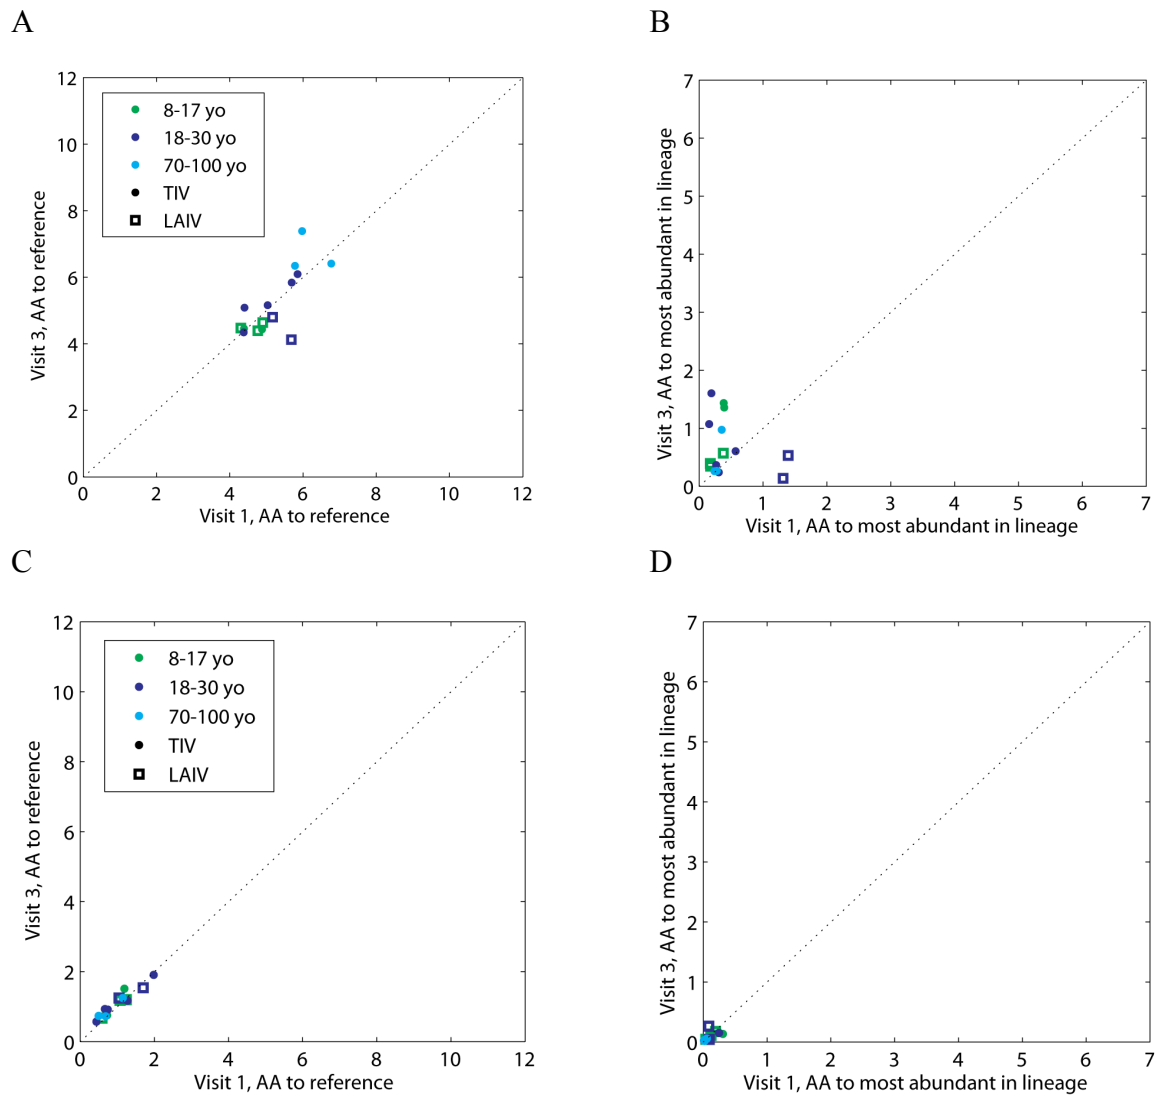

**Fig. S15.** The mutation patterns for different age groups at threshold of 90% of nucleotide similarity in the CDR3 region. This analysis was applied to IgG in the PBMCs at visit 1 (A, B) and IgM in the PBMCs at visit 1 (C, D). 3000 reads of subsampling was applied to this figure.



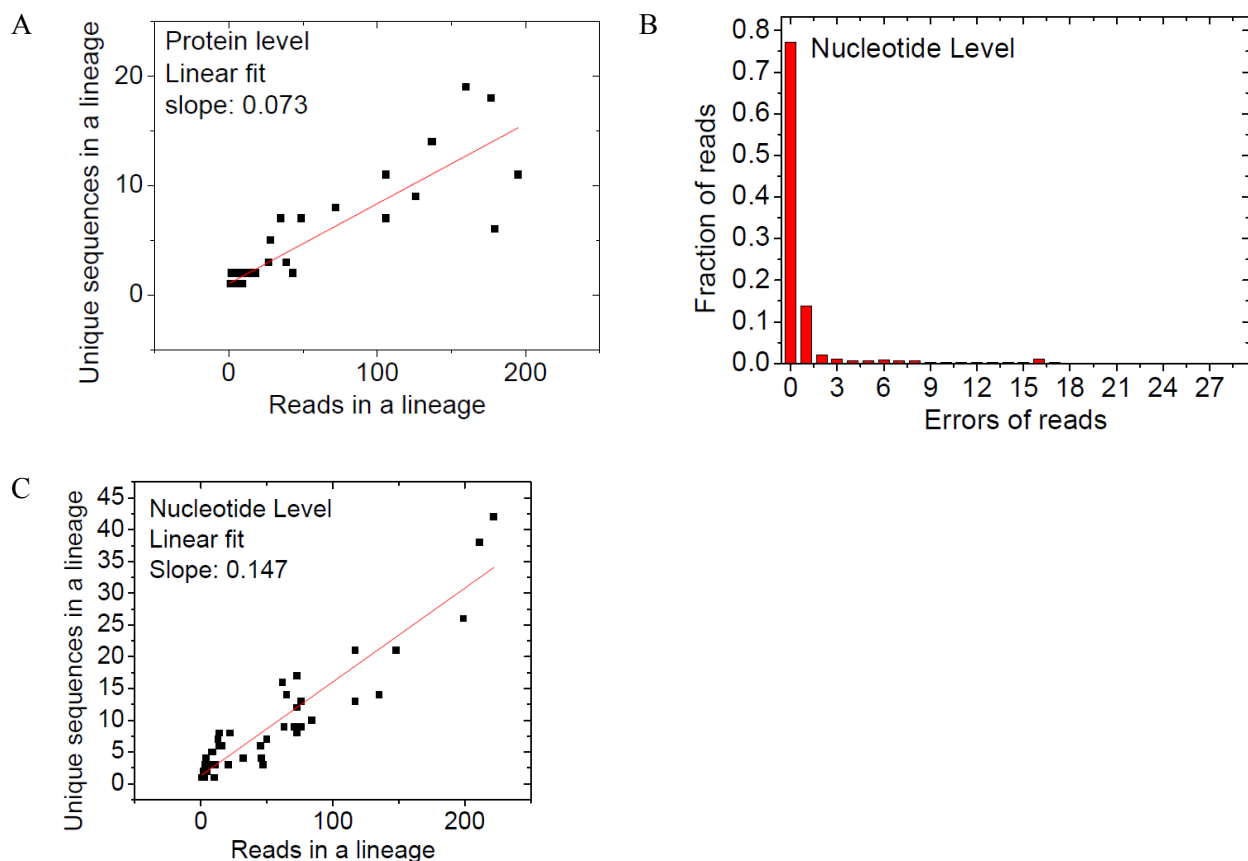

**Fig. S16.** Zebrafish control data. (A), relationship of number of reads and unique protein sequences in a cluster. Each data point is a cluster. The red line is the linear fit to the data. Clusters with more than 200 reads are excluded from this figure. (B), error rate profile of the control data at nucleotide level. The reference sequences are the most abundant sequence in each template. Indels are excluded (C), relationship of number of reads and unique nucleotide sequences in a cluster. Each data point is a cluster. The red line is the linear fit to the data.

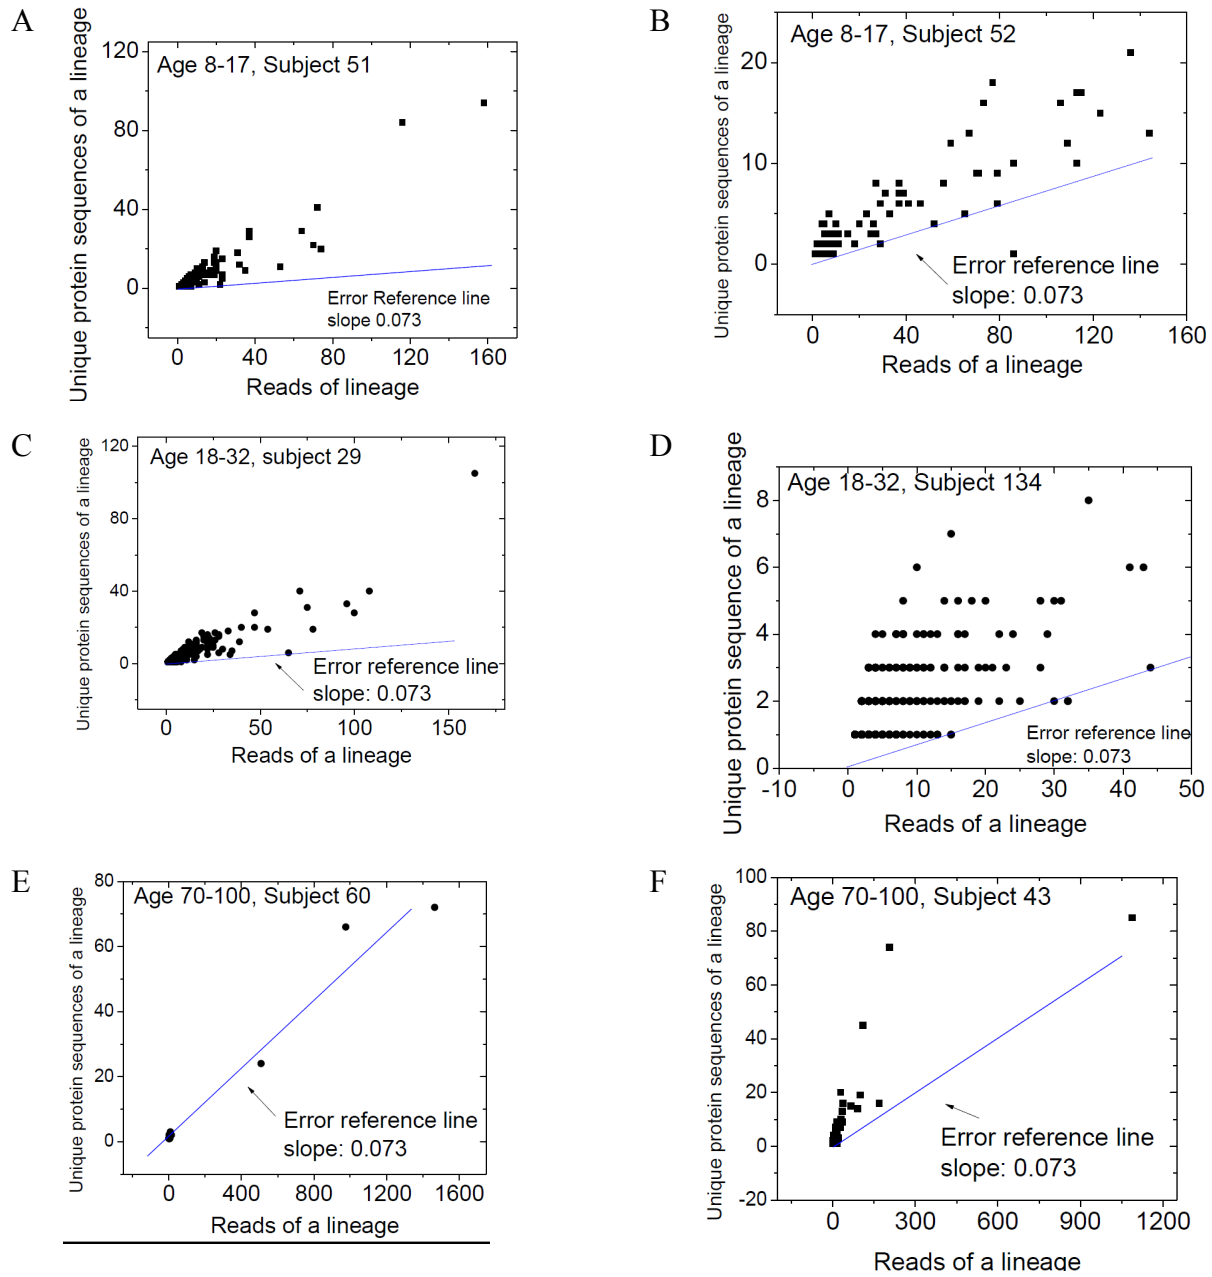

**Fig. S17.** Diversity and reads of IgG lineages of human plasmablasts at visit 2. Each dot in the figures is a lineage. X- and Y- axis are reads and unique protein sequences of the lineage respectively. The blue line is the expected diversity from zebrafish control data. The slope, 0.073, was estimated from Supplementary Figure 16A.

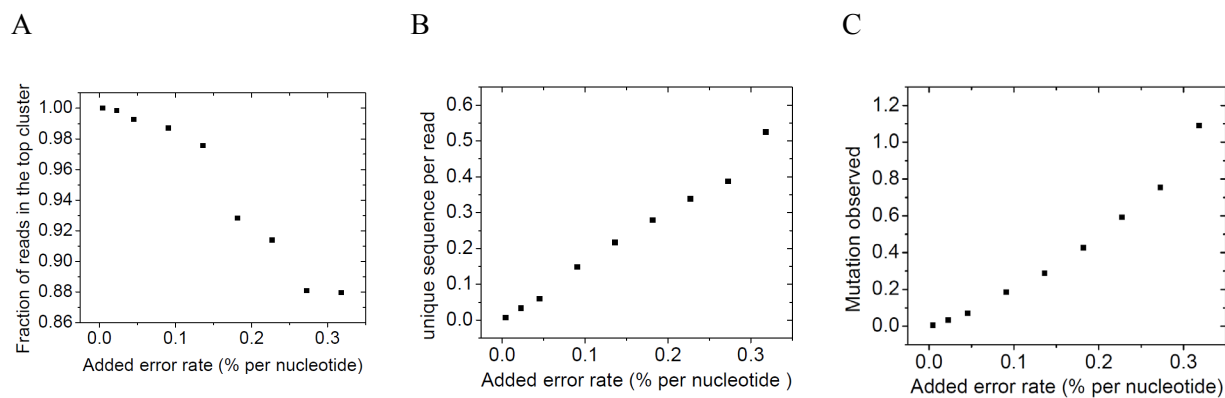

**Fig. S18.** Synthetic sequence control data. (A), the fraction of reads in the largest cluster is linearly proportional to the added error rate. (B), added errors increase the diversity. (C), added errors increase the mutation from baseline. Each data point is an independent trial.

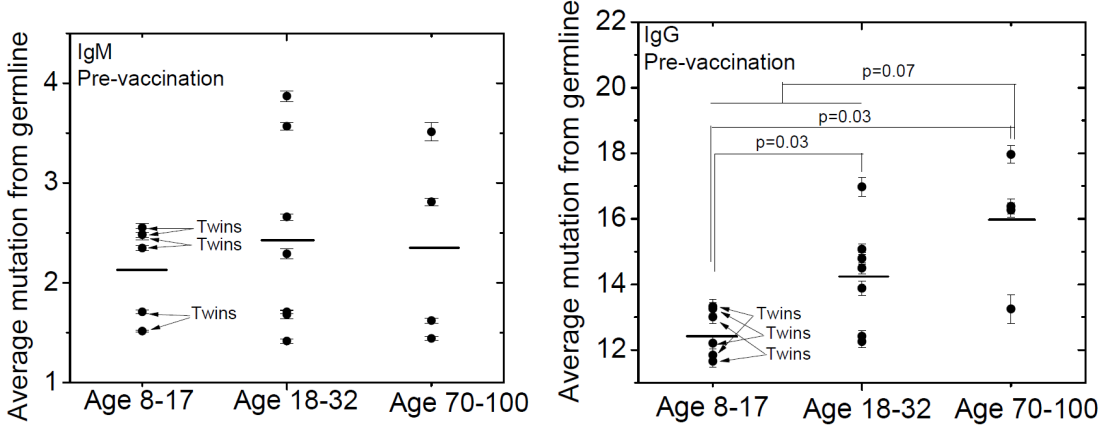

**Fig. S19.** Figures 3B and 3C, respectively, from the main text with twin status indicated by arrows. p value was calculated by Mann-Whitney U test.

## Supplementary Tables

**Table S1.** Demographical information of human participants.

| Patient ID | Age    | Vaccine year | Vaccine | twin-status   |
|------------|--------|--------------|---------|---------------|
| 017-006    | 18-30  | 2009         | TIV     | NA            |
| 017-011    | 18-30  | 2009         | TIV     | NA            |
| 017-029    | 18-30  | 2009         | TIV     | NA            |
| 017-025    | 70-100 | 2009         | TIV     | NA            |
| 017-043    | 70-100 | 2009         | TIV     | NA            |
| 017-044    | 70-100 | 2009         | TIV     | NA            |
| 017-060    | 70-100 | 2009         | TIV     | NA            |
| 017-051    | 8-17   | 2009         | TIV     | twin with 052 |
| 017-052    | 8-17   | 2009         | LAIV    | twin with 051 |
| 017-053    | 8-17   | 2009         | LAIV    | twin with 054 |
| 017-054    | 8-17   | 2009         | TIV     | twin with 053 |
| 017-057    | 8-17   | 2009         | LAIV    | twin with 058 |
| 017-058    | 8-17   | 2009         | TIV     | twin with 057 |
| 017-134    | 18-30  | 2010         | LAIV    | NA            |
| 017-124    | 18-30  | 2010         | LAIV    | NA            |
| 017-133    | 18-30  | 2010         | TIV     | NA            |
| 017-093    | 18-30  | 2010         | TIV     | NA            |

**Table S2.** Primer sequences.

|                               |                      |
|-------------------------------|----------------------|
| PCR forward primers           |                      |
| LR1                           | CGCAGACCCTCTCACTCAC  |
| LR2                           | TGGAGCTGAGGTGAAGAAGC |
| LR3                           | TGCAATCTGGGTCTGAGTTG |
| LR4                           | GGCTCAGGACTGGTGAAGC  |
| LR5                           | TGGAGCAGAGGTGAAAAGC  |
| LR6                           | GGTGCAGCTGTTGGAGTCT  |
| LR7                           | ACTGTTGAAGCCTTCGGAGA |
| LR8                           | AAACCCACACAGACCCTCAC |
| LR9                           | AGTCTGGGGCTGAGGTGAAG |
| LR10                          | GGCCCAGGACTGGTGAAG   |
| LR11                          | GGTGCAGCTGGTGGAGTC   |
| PCR reverse primers           |                      |
| IgG-PCR                       | AAGACCGATGGGCCCTTG   |
| IgA-PCR                       | GAAGACCTTGGGGCTGGT   |
| IgM-PCR                       | GGGAATTCTCACAGGAGACG |
| IgE-PCR                       | GAAGACGGATGGGCTCTGT  |
| IgD-PCR                       | GGGTGTCTGCACCCTGATA  |
| Reverse transcription primers |                      |
| IgG-RT                        | GGGAAGTAGTCCTTGACCAG |
| IgA-RT                        | GGGGAAGAAGCCCTGGAC   |
| IgM-RT                        | GGCCACGCTGCTCGTATC   |
| IgE-RT                        | AGGGAATGTTTTGCAGCAG  |
| IgD-RT                        | CCACAGGGCTGTTATCCTTT |

**Table S3.** Summary of cell numbers and filtered reads for all samples.

| Subject ID | Visit 1<br>PBMC<br>(reads) | Visit 2<br>Naïve B<br>cells (reads) | Visit2 Naïve<br>B cell # | Visit 2<br>Plasmablasts<br>(reads) | Visit 2<br>Plasmablasts<br># | Visit 3<br>PBMC<br>(reads) | Visit 2<br>PBMC<br>(reads) |
|------------|----------------------------|-------------------------------------|--------------------------|------------------------------------|------------------------------|----------------------------|----------------------------|
| 017-006    | 18370                      | 251140                              | 88576                    | 25356                              | 12557                        | 23743                      | N/A                        |
| 017-011    | 112250                     | 59494                               | 10467                    | 51575                              | 1847                         | 40451                      | N/A                        |
| 017-029    | 29134                      | 81014                               | 39502                    | 82336                              | 46135                        | 288484                     | N/A                        |
| 017-025    | 66900                      | 42305                               | 8453                     | 83360                              | 3100                         | 84739                      | N/A                        |
| 017-043    | 3949                       | 66050                               | 66472                    | 25290                              | 33455                        | 35149                      | N/A                        |
| 017-044    | 31467                      | 18638                               | 23974                    | 24492                              | 8402                         | 26262                      | N/A                        |
| 017-060    | 33560                      | 26538                               | 29361                    | 14421                              | 3346                         | 26769                      | N/A                        |
| 017-051    | 51442                      | 61240                               | 189294                   | 63736                              | 156019                       | 100499                     | N/A                        |
| 017-054    | 62117                      | 51034                               | 61915                    | 98952                              | 78264                        | 51243                      | N/A                        |
| 017-052    | 95625                      | 57756                               | 86783                    | 56080                              | 6501                         | 64980                      | N/A                        |
| 017-053    | 35488                      | 40826                               | 50815                    | 27124                              | 126634                       | 28840                      | N/A                        |
| 017-058    | 10926                      | 11869                               | 29332                    | 15956                              | 10758                        | 20180                      | N/A                        |
| 017-057    | 28584                      | 25628                               | 28313                    | 28544                              | 13648                        | 23884                      | N/A                        |
| 017-093    | 34364                      | 91                                  | 100000                   | 15574                              | 5000                         | 32417                      | 28700                      |
| 017-134    | 45987                      | 73627                               | 118000                   | 113360                             | 8600                         | 32296                      | 59247                      |
| 017-124    | 16127                      | 35672                               | 124000                   | 13040                              | 27000                        | 27887                      | 27008                      |
| 017-133    | 33547                      | 42297                               | 28000                    | 13183                              | 36000                        | 29806                      | 26531                      |
| Average    | 41755                      | 55601                               |                          | 44257                              |                              | 55154                      | 32506                      |

**Table S4.** Raw reads for five isotypes in each sample. Reads from a subset of runs were used.

| subject |         |              | IgM    | IgA   | IgG   | IgD  | IgE | Isotype identifiable |
|---------|---------|--------------|--------|-------|-------|------|-----|----------------------|
| 52      | visit 2 | Plasmablasts | 6862   | 21998 | 26422 | 163  | 635 | 56080                |
| 53      | visit 2 | Plasmablasts | 3023   | 5446  | 12349 | 3    | 148 | 20969                |
| 51      | visit 2 | Plasmablasts | 6859   | 16742 | 39813 | 50   | 272 | 63736                |
| 54      | visit 2 | Plasmablasts | 18005  | 20555 | 60055 | 5    | 332 | 98952                |
| 57      | visit 2 | Plasmablasts | 2280   | 12312 | 13937 | 15   | 0   | 28544                |
| 58      | visit 2 | Plasmablasts | 1507   | 2902  | 11539 | 8    | 0   | 15956                |
| 6       | visit 2 | Plasmablasts | 2687   | 7749  | 14890 | 0    | 30  | 25356                |
| 11      | visit 2 | Plasmablasts | 4591   | 17676 | 28546 | 499  | 263 | 51575                |
| 29      | visit 2 | Plasmablasts | 24728  | 15764 | 41613 | 4    | 227 | 82336                |
| 134     | visit 2 | Plasmablasts | 19983  | 44492 | 48333 | 72   | 480 | 113360               |
| 93      | visit 2 | Plasmablasts | 2553   | 4356  | 8401  | 58   | 206 | 15574                |
| 124     | visit 2 | Plasmablasts | 1124   | 6702  | 5186  | 18   | 10  | 13040                |
| 133     | visit 2 | Plasmablasts | 331    | 2221  | 10620 | 0    | 11  | 13183                |
| 25      | visit 2 | Plasmablasts | 6343   | 31777 | 43851 | 784  | 605 | 83360                |
| 43      | visit 2 | Plasmablasts | 1535   | 126   | 23615 | 3    | 11  | 25290                |
| 44      | visit 2 | Plasmablasts | 1688   | 526   | 22268 | 10   | 0   | 24492                |
| 60      | visit 2 | Plasmablasts | 150    | 8244  | 6022  | 2    | 3   | 14421                |
| 6       | visit 1 | PBMC         | 10235  | 4389  | 3324  | 415  | 7   | 18370                |
| 11      | visit 1 | PBMC         | 60684  | 26467 | 22410 | 2600 | 89  | 112250               |
| 25      | visit 1 | PBMC         | 39665  | 12934 | 10734 | 3557 | 10  | 66900                |
| 29      | visit 1 | PBMC         | 17189  | 7875  | 3440  | 501  | 129 | 29134                |
| 43      | visit 1 | PBMC         | 2999   | 70    | 583   | 296  | 1   | 3949                 |
| 44      | visit 1 | PBMC         | 19177  | 401   | 9972  | 1859 | 58  | 31467                |
| 52      | visit 1 | PBMC         | 65497  | 15315 | 10016 | 4746 | 51  | 95625                |
| 53      | visit 1 | PBMC         | 11456  | 4443  | 1558  | 1177 | 4   | 18638                |
| 60      | visit 1 | PBMC         | 22447  | 5302  | 5001  | 791  | 19  | 33560                |
| 57      | visit 1 | PBMC         | 14223  | 8256  | 5744  | 355  | 6   | 28584                |
| 93      | visit 1 | PBMC         | 17092  | 6199  | 10182 | 875  | 16  | 34364                |
| 133     | visit 1 | PBMC         | 14570  | 6350  | 11402 | 1187 | 38  | 33547                |
| 134     | visit 1 | PBMC         | 15961  | 14550 | 14732 | 725  | 19  | 45987                |
| 124     | visit 1 | PBMC         | 6522   | 5616  | 3436  | 525  | 28  | 16127                |
| 58      | visit 1 | PBMC         | 5652   | 2315  | 2714  | 242  | 3   | 10926                |
| 51      | visit 1 | PBMC         | 34254  | 7897  | 6680  | 2163 | 448 | 51442                |
| 54      | visit 1 | PBMC         | 33666  | 19360 | 7492  | 1562 | 37  | 62117                |
| 6       | visit 3 | PBMC         | 8961   | 7204  | 7310  | 233  | 35  | 23743                |
| 11      | visit 3 | PBMC         | 20428  | 10671 | 7870  | 1465 | 17  | 40451                |
| 25      | visit 3 | PBMC         | 45215  | 15842 | 18957 | 4653 | 72  | 84739                |
| 29      | visit 3 | PBMC         | 138619 | 65065 | 74933 | 9350 | 517 | 288484               |



|     |         |               |        |       |       |      |      |        |
|-----|---------|---------------|--------|-------|-------|------|------|--------|
| 43  | visit 3 | PBMC          | 25903  | 318   | 6981  | 1939 | 8    | 35149  |
| 44  | visit 3 | PBMC          | 12498  | 327   | 12349 | 990  | 98   | 26262  |
| 52  | visit 3 | PBMC          | 40503  | 11625 | 9433  | 2625 | 794  | 64980  |
| 53  | visit 3 | PBMC          | 11589  | 5926  | 2046  | 1193 | 10   | 20764  |
| 60  | visit 3 | PBMC          | 17947  | 4098  | 3890  | 817  | 17   | 26769  |
| 57  | visit 3 | PBMC          | 11575  | 6951  | 5058  | 280  | 20   | 23884  |
| 93  | visit 3 | PBMC          | 13571  | 6890  | 11177 | 762  | 17   | 32417  |
| 133 | visit 3 | PBMC          | 11291  | 7389  | 10296 | 813  | 17   | 29806  |
| 134 | visit 3 | PBMC          | 11613  | 9220  | 11120 | 336  | 7    | 32296  |
| 124 | visit 3 | PBMC          | 10979  | 8329  | 6016  | 2542 | 21   | 27887  |
| 58  | visit 3 | PBMC          | 7098   | 6657  | 5850  | 567  | 8    | 20180  |
| 51  | visit 3 | PBMC          | 45315  | 34524 | 16452 | 4022 | 186  | 100499 |
| 54  | visit 3 | PBMC          | 19909  | 22037 | 7655  | 1496 | 146  | 51243  |
| 134 | visit 2 | Naïve B cells | 65372  | 2310  | 4150  | 1633 | 162  | 73627  |
| 93  | visit 2 | Naïve B cells | 90     | 0     | 1     | 0    | 0    | 91     |
| 124 | visit 2 | Naïve B cells | 32776  | 737   | 1328  | 826  | 5    | 35672  |
| 133 | visit 2 | Naïve B cells | 37141  | 1247  | 2919  | 952  | 38   | 42297  |
| 6   | visit 2 | Naïve B cells | 209550 | 12793 | 24457 | 3722 | 618  | 251140 |
| 11  | visit 2 | Naïve B cells | 48579  | 1155  | 2884  | 5956 | 920  | 59494  |
| 29  | visit 2 | Naïve B cells | 57741  | 6148  | 9659  | 6028 | 1438 | 81014  |
| 25  | visit 2 | Naïve B cells | 31518  | 1885  | 3631  | 3199 | 2072 | 42305  |
| 43  | visit 2 | Naïve B cells | 60009  | 47    | 850   | 5117 | 27   | 66050  |
| 44  | visit 2 | Naïve B cells | 13576  | 154   | 3149  | 1739 | 20   | 18638  |
| 60  | visit 2 | Naïve B cells | 24717  | 91    | 1129  | 576  | 25   | 26538  |
| 51  | visit 2 | Naïve B cells | 35896  | 5872  | 13164 | 4887 | 1421 | 61240  |
| 52  | visit 2 | Naïve B cells | 46047  | 2106  | 3220  | 5584 | 799  | 57756  |
| 53  | visit 2 | Naïve B cells | 16385  | 2127  | 2410  | 1208 | 38   | 22168  |
| 54  | visit 2 | Naïve B cells | 35615  | 2039  | 8639  | 3917 | 824  | 51034  |
| 57  | visit 2 | Naïve B cells | 23952  | 455   | 549   | 594  | 78   | 25628  |
| 58  | visit 2 | Naïve B cells | 10281  | 219   | 698   | 665  | 6    | 11869  |

**Table S5.** Summary of identifiable VJ reads for IgG in visit 2 plasmablasts.

| Subject ID | Identifiable IgG VJ reads | Raw IgGreads | Fraction of identifiable VJ reads |
|------------|---------------------------|--------------|-----------------------------------|
| 51         | 39389                     | 39813        | 0.98935                           |
| 54         | 59465                     | 60055        | 0.990176                          |
| 53         | 21127                     | 21367        | 0.988768                          |
| 58         | 11528                     | 11539        | 0.999047                          |
| 57         | 13870                     | 13937        | 0.995193                          |
| 29         | 41165                     | 41613        | 0.989234                          |
| 6          | 14772                     | 14890        | 0.992075                          |
| 25         | 42072                     | 43851        | 0.959431                          |
| 43         | 23608                     | 23615        | 0.999704                          |
| 44         | 22222                     | 22268        | 0.997934                          |
| 60         | 6010                      | 6022         | 0.998007                          |
| 11         | 27883                     | 28546        | 0.976774                          |
| 52         | 24693                     | 26422        | 0.934562                          |
| 134        | 48024                     | 48333        | 0.993607                          |
| 93         | 8376                      | 8401         | 0.997024                          |
| 124        | 5173                      | 5186         | 0.997493                          |
| 133        | 10605                     | 10620        | 0.998588                          |

**Table S6.** Summary of single cell cloned sequences.

| subject 017-043 |                                                         |                                                                     |                                                                     |                               |                                                                   |                                                                   |                                  |                                                                      |
|-----------------|---------------------------------------------------------|---------------------------------------------------------------------|---------------------------------------------------------------------|-------------------------------|-------------------------------------------------------------------|-------------------------------------------------------------------|----------------------------------|----------------------------------------------------------------------|
| antibody        | identical AA sequences in visit 2 PB (excluding itself) | unique AA sequences in the cluster (excluding itself) in visit 2 PB | reads of the SCC containing cluster (including itself)in visit 2 PB | Mutation (nt) of SCC antibody | Minimum mutation (nt) of the SCC containing cluster in visit 2 PB | Maximum mutation (nt) of the SCC containing cluster in visit 2 PB | SCC sequence Binding to antigen? | Unique AA sequences in the cluster (excluding itself) in visit 3PBMC |
| A06             | 0                                                       | 0                                                                   | 1                                                                   | 8                             | 8                                                                 | 8                                                                 | N                                | 0                                                                    |
| B03             | 3764                                                    | 427                                                                 | 6884                                                                | 7                             | 3                                                                 | 15                                                                | N                                | 1                                                                    |
| C02             | 0                                                       | 4                                                                   | 38                                                                  | 9                             | 9                                                                 | 12                                                                | Y                                | 1                                                                    |
| C06             | 43                                                      | 427                                                                 | 6884                                                                | 8                             | 3                                                                 | 15                                                                | N                                | 1                                                                    |
| D06             | 5                                                       | 427                                                                 | 6884                                                                | 13                            | 3                                                                 | 15                                                                | N                                | 1                                                                    |
| E04             | 0                                                       | 541                                                                 | 2599                                                                | 39                            | 14                                                                | 40                                                                | Y                                | 0                                                                    |
| E05             | 207                                                     | 427                                                                 | 6884                                                                | 8                             | 3                                                                 | 15                                                                | N                                | 1                                                                    |
| E06             | 70                                                      | 427                                                                 | 6884                                                                | 7                             | 3                                                                 | 15                                                                | N                                | 1                                                                    |
| F06             | 1                                                       | 7                                                                   | 59                                                                  | 14                            | 14                                                                | 18                                                                | Y                                | 17                                                                   |
| G04             | 0                                                       | 0                                                                   | 1                                                                   | 12                            | 12                                                                | 12                                                                | N                                | 0                                                                    |

| subject 017-044 |                                                         |                                                                     |                                                                     |                               |                                                                   |                                                                   |                                  |                                                          |
|-----------------|---------------------------------------------------------|---------------------------------------------------------------------|---------------------------------------------------------------------|-------------------------------|-------------------------------------------------------------------|-------------------------------------------------------------------|----------------------------------|----------------------------------------------------------|
| antibody        | identical AA sequences in visit 2 PB (excluding itself) | unique AA sequences in the cluster (excluding itself) in visit 2 PB | reads of the SCC containing cluster (including itself)in visit 2 PB | Mutation (nt) of SCC antibody | Minimum mutation (nt) of the SCC containing cluster in visit 2 PB | Maximum mutation (nt) of the SCC containing cluster in visit 2 PB | SCC sequence Binding to antigen? | Unique AA sequences in the cluster (excluding itself) in |

|     |   |    |     |    |    |    |   |   | visit 3<br>PBMC |
|-----|---|----|-----|----|----|----|---|---|-----------------|
| B01 | 0 | 5  | 22  | 22 | 18 | 29 | N | 0 |                 |
| B03 | 0 | 0  | 1   | 7  | 7  | 7  | N | 0 |                 |
| C05 | 0 | 11 | 103 | 24 | 24 | 28 | Y | 0 |                 |
| C06 | 0 | 0  | 1   | 25 | 25 | 25 | Y | 0 |                 |
| D02 | 0 | 0  | 1   | 10 | 10 | 10 | N | 0 |                 |
| E03 | 0 | 3  | 31  | 13 | 11 | 16 | Y | 0 |                 |

**Table S7.** Control data information.

| Zebrafish control library Roche 454 sequencing reads information |             |
|------------------------------------------------------------------|-------------|
| Number of sequence template                                      | 38          |
| Total reads in analysis                                          | 32453       |
| Total unique sequences                                           | 1776        |
| Total reads in top 38 sequences (percentage)                     | 28194 (87%) |
